# Supplementary material for: Giant ants and their shape: revealing relationships in the genus Titanomyrma with geometric morphometrics
Source: PeerJ. 2018 Jan 16;6:e4242. doi: 10.7717/peerj.4242 (PMC5774302; doi:10.7717/peerj.4242)
Supplement: Supplemental Information 2 [file peerj-06-4242-s002.xlsx]

## Sheet: Formicium_Classifiers_All
ID	Wing	Locality	Species	Sex	Notes	Missing LM?	2 wings preserved?	Scale?	Complete Wing?
HLMD-Me-13500.jpg	R	Messe	gigan	m			ü
HLMD-Me-13500_MIR.jpg	L	Messe	gigan	m			ü
MeI1004-01_MIR.jpg	L	Messe	simil	f	PCA	ü		ü
MeI1005-01_MIR.jpg	L	Messe	gigan	f	PCA			ü
MeI1006-01-Holotypus-Formicium-simillimum.jpg	R	Messe	simil	f	PCA		ü	ü
MeI1006-01-Holotypus-Formicium-simillimum_MIR.jpg	L	Messe	simil	f	PCA		ü	ü
MeI1008-01.jpg	R	Messe	simil	f	PCA			ü
MeI1008-01_MIR.jpg	L	Messe	simil	f	PCA	ü		ü
MeI1010-01.jpg	R	Messe	gigan	f	PCA	ü		ü
MeI1013-01.jpg	R	Messe	simil	f	PCA			ü
MeI10138-01_MIR.jpg	L	Messe	simil	m	PCA			ü
MeI102-01.jpg	R	Messe	gigan	f	PCA	ü		ü
MeI10403-01.jpg	R	Messe	gigan	f		ü		ü
MeI104a-01_MIR.jpg	L	Messe	gigan	f	PCA	ü		ü
MeI104b-01.jpg	R	Messe	gigan	f	PCA			ü
MeI105-01_MIR.jpg	L	Messe	simil	f	PCA			ü
MeI10793-01.jpg	R	Messe	gigan	m	PCA			ü	ü
MeI10911-01.jpg	R	Messe	gigan	f				ü
MeI10913-01_MIR.jpg	L	Messe	gigan	f	PCA	ü		ü
MeI11034-01_MIR.jpg	L	Messe	simil	m				ü
MeI11128-01_MIR.jpg	L	Messe	gigan	f	PCA	ü		ü
MeI11239-01.jpg	R	Messe	gigan	m	PCA			ü	ü
MeI11487-01_MIR.jpg	L	Messe	gigan	m	PCA			ü
MeI11659-01_MIR.jpg	L	Messe	gigan	f	PCA	ü		ü
MeI11806-01_MIR.jpg	L	Messe	gigan	f	PCA	ü		ü
MeI11838-01_MIR.jpg	L	Messe	gigan	m	PCA			ü
MeI12090-01.jpg	R	Messe	gigan	f	PCA		ü	ü
MeI12090-01_MIR.jpg	L	Messe	gigan	f	PCA		ü	ü
MeI12091-01.jpg	R	Messe	gigan	f	PCA	ü	ü	ü
MeI12091-01_MIR.jpg	L	Messe	gigan	f	PCA		ü	ü	ü
MeI12092-01_MIR.jpg	L	Messe	gigan	f	PCA			ü	ü
MeI12096-01.jpg	R	Messe	gigan	f	PCA	ü		ü
MeI12097-01_MIR.jpg	L	Messe	gigan	f	PCA			ü	ü
MeI12101-01_MIR.jpg	L	Messe	simil	f	PCA	ü		ü
MeI12104-01.jpg	R	Messe	gigan	m	PCA		ü	ü
MeI12104-01_MIR.jpg	L	Messe	gigan	m	PCA		ü	ü
MeI12110-01.jpg	R	Messe	simil	f	PCA		ü	ü
MeI12110-01_MIR.jpg	L	Messe	simil	f	PCA		ü	ü
MeI1219-01.jpg	R	Messe	gigan	f	PCA	ü		ü
MeI1220-01.jpg	R	Messe	gigan	f	PCA	ü		ü
MeI12258-01_MIR.jpg	L	Messe	gigan	f	PCA	ü		ü
MeI12260-01.jpg	R	Messe	gigan	f	PCA			ü
MeI12261-01_MIR.jpg	L	Messe	gigan	f	PCA			ü	ü
MeI12262-01_MIR.jpg	L	Messe	gigan	f	PCA	ü		ü
MeI12263-01_MIR.jpg	L	Messe	gigan	f	PCA	ü		ü
MeI1230-01.jpg	R	Messe	gigan	f	PCA	ü	ü	ü
MeI1230-01_MIR.jpg	L	Messe	gigan	f	PCA	ü	ü	ü
MeI1234-01.jpg	R	Messe	gigan	f	PCA	ü	ü	ü
MeI1234-01_MIR.jpg	L	Messe	gigan	f	PCA		ü	ü
MeI1235-01_MIR.jpg	L	Messe	gigan	f	PCA			ü
MeI1238-01.jpg	R	Messe	gigan	m	PCA		ü	ü
MeI1238-01_MIR.jpg	L	Messe	gigan	m	PCA	ü	ü	ü
MeI1241-01.jpg	R	Messe	gigan	f	PCA	ü		ü
MeI1243-01.jpg	R	Messe	gigan	f	PCA	ü		ü	ü
MeI1249-01_MIR.jpg	L	Messe	gigan	f	PCA			ü	ü
MeI1250-01.jpg	R	Messe	gigan	f	PCA			ü
MeI12666-01.jpg	R	Messe	simil	f	PCA			ü
MeI12668-01_MIR.jpg	L	Messe	simil	f	PCA			ü
MeI12671-01.jpg	R	Messe	gigan	f		ü		ü
MeI12878-01.jpg	R	Messe	simil	f			ü	ü
MeI12878-01_MIR.jpg	L	Messe	simil	f			ü	ü
MeI12879-01_MIR.jpg	L	Messe	gigan	f	PCA	ü		ü
MeI12881-01.jpg	R	Messe	gigan	f	PCA	ü		ü
MeI12882-01_MIR.jpg	L	Messe	gigan	f	PCA	ü		ü
MeI13192-01_MIR.jpg	L	Messe	gigan	f		ü		ü
MeI13193-01.jpg	R	Messe	gigan	f		ü	ü	ü
MeI13193-01_MIR.jpg	L	Messe	gigan	f	bad interpolation	ü	ü	ü
MeI13274-01.jpg	R	Messe	gigan	f	PCA			ü
MeI13275-01.jpg	R	Messe	gigan	f			ü	ü
MeI13275-01_MIR.jpg	L	Messe	gigan	f			ü	ü
MeI13441-98_MIR.jpg	L	Messe	simil	f	PCA
MeI13442-95_MIR.jpg	L	Messe	gigan	f	PCA
MeI13444-94_MIR.jpg	L	Messe	gigan	f	PCA	ü
MeI13554-92_MIR.jpg	L	Messe	gigan	f
MeI13555-91.jpg	R	Messe	gigan	f
MeI13622-90_MIR.jpg	L	Messe	gigan	f					ü
MeI13623-89_MIR.jpg	L	Messe	gigan	f	PCA	ü
MeI13626-88_MIR.jpg	L	Messe	gigan	f	PCA
MeI13628-86.jpg	R	Messe	gigan	f			ü
MeI13628-86_MIR.jpg	L	Messe	gigan	f			ü
MeI13848-81.jpg	R	Messe	gigan	f
MeI14017-01.jpg	R	Messe	simil	f	PCA
MeI14041-80.jpg	R	Messe	gigan	f
MeI14042-79_MIR.jpg	L	Messe	gigan	f		ü
MeI14043-78.jpg	R	Messe	gigan	f
MeI14045-76.jpg	R	Messe	gigan	f
MeI14045-76_MIR.jpg	L	Messe	gigan	f		ü
MeI14046-75_MIR.jpg	L	Messe	gigan	f
MeI14048-73_MIR.jpg	L	Messe	gigan	f
MeI14092-01.jpg	R	Messe	simil	m				ü
MeI14158-71.jpg	R	Messe	simil	f
MeI14184-70_MIR.jpg	L	Messe	gigan	f
MeI14185-69_MIR.jpg	L	Messe	gigan	f
MeI14189-68_MIR.jpg	L	Messe	gigan	f	PCA
MeI14190-67.jpg	R	Messe	gigan	f	PCA
MeI14295-65_MIR.jpg	L	Messe	gigan	f					ü
MeI14308-50_MIR.jpg	L	Messe	gigan	f
MeI14310-53_MIR.jpg	L	Messe	gigan	f		ü
MeI14311-54.jpg	R	Messe	gigan	f					ü
MeI14312-55.jpg	R	Messe	gigan	f
MeI14313-56_MIR.jpg	L	Messe	gigan	f
MeI14316-59_MIR.jpg	L	Messe	gigan	f
MeI14317-60_MIR.jpg	L	Messe	gigan	f		ü
MeI14318-61_MIR.jpg	L	Messe	simil	f	wrongly determined	ü
MeI14321-64.jpg	R	Messe	simil	f
MeI14402-01.jpg	R	Messe	simil	m	PCA			ü
MeI14404-49_MIR.jpg	L	Messe	simil	m	PCA
MeI14422-47_MIR.jpg	L	Messe	gigan	m	PCA
MeI14523-45_MIR.jpg	L	Messe	gigan	f
MeI14527-39_MIR.jpg	L	Messe	simil	f		ü
MeI14528-40.jpg	R	Messe	gigan	f	PCA
MeI14667-22.jpg	R	Messe	simil	f
MeI14769-23_MIR.jpg	L	Messe	gigan	f		ü
MeI14770-25_MIR.jpg	L	Messe	gigan	f
MeI14771-26.jpg	R	Messe	gigan	f	bad interpolation	ü
MeI14773-29.jpg	R	Messe	gigan	f		ü
MeI14774-30.jpg	R	Messe	simil	f
MeI14775-31_MIR.jpg	L	Messe	simil	f
MeI14776-32_MIR.jpg	L	Messe	gigan	f
MeI14787-34_MIR.jpg	L	Messe	simil	f		ü
MeI14792-20_MIR.jpg	L	Messe	gigan	f	PCA
MeI1483-01.jpg	R	Messe	simil	f	wrongly determined			ü
MeI14901-19_MIR.jpg	L	Messe	simil	f	PCA
MeI15036-17.jpg	R	Messe	simil	f	PCA
MeI1508-01_MIR.jpg	L	Messe	gigan	m	PCA			ü
MeI15185-12.jpg	R	Messe	gigan	f	PCA
MeI15186-14.jpg	R	Messe	gigan	f
MeI15187-15_MIR.jpg	L	Messe	gigan	f
MeI15188-16_MIR.jpg	L	Messe	gigan	f
MeI15277-01_MIR.jpg	L	Messe	simil	m	PCA
MeI15300-01_MIR.jpg	L	Messe	gigan	m	Scale			ü
MeI15337-10.jpg	R	Messe	gigan	m	PCA
MeI15339-09.jpg	R	Messe	gigan	f
MeI15340-08_MIR.jpg	L	Messe	simil	f	PCA
MeI15341-07.jpg	R	Messe	gigan	f
MeI15342-06_MIR.jpg	L	Messe	gigan	f
MeI15343-05.jpg	R	Messe	gigan	f		ü	ü
MeI15343-05_MIR.jpg	L	Messe	gigan	f			ü
MeI15344-04.jpg	R	Messe	gigan	f
MeI15345-02.jpg	R	Messe	gigan	f			ü
MeI15345-02_MIR.jpg	L	Messe	gigan	f			ü
MeI1537-01.jpg	R	Messe	simil	f	PCA,example			ü
MeI1539-01_MIR.jpg	L	Messe	simil	f	PCA			ü
MeI1544-01_MIR.jpg	L	Messe	gigan	f	PCA			ü
MeI1804-01_MIR.jpg	L	Messe	simil	f	PCA, possibly male			ü
MeI184-01.jpg	R	Messe	simil	f	PCA			ü
MeI186-01.jpg	R	Messe	gigan	f	PCA	ü		ü
MeI187-01.jpg	R	Messe	gigan	f		ü		ü
MeI2006-01.jpg	R	Messe	simil	f	PCA	ü		ü
MeI2024-01_MIR.jpg	L	Messe	simil	f	PCA			ü
MeI2044-01.jpg	R	Messe	gigan	f	PCA			ü
MeI2045-01.jpg	R	Messe	gigan	f	PCA			ü
MeI2046-01.jpg	R	Messe	simil	f	PCA	ü		ü
MeI2047-01_MIR.jpg	L	Messe	simil	f	PCA			ü
MeI2048-01.jpg	R	Messe	simil	f	PCA			ü
MeI2049-01_MIR.jpg	L	Messe	simil	f	PCA			ü
MeI2050-01_MIR.jpg	L	Messe	simil	f	PCA			ü
MeI2055-01_MIR.jpg	L	Messe	simil	f	PCA			ü
MeI2058-01_MIR.jpg	L	Messe	gigan	f	PCA			ü	ü
MeI2059-01_MIR.jpg	L	Messe	simil	f	PCA			ü
MeI2098-01_MIR.jpg	L	Messe	simil	f	PCA			ü
MeI2099-01.jpg	R	Messe	simil	f	PCA			ü
MeI2123-01_MIR.jpg	L	Messe	gigan	f	PCA			ü
MeI2317-01.jpg	R	Messe	gigan	m	PCA	ü	ü	ü
MeI2317-01_MIR.jpg	L	Messe	gigan	m	PCA		ü	ü
MeI2335-01.jpg	R	Messe	simil	m				ü
MeI2360-01.jpg	R	Messe	gigan	m	PCA		ü	ü
MeI2360-01_MIR.jpg	L	Messe	gigan	m	PCA		ü	ü
MeI2361-01.jpg	R	Messe	gigan	m	PCA, Regression			ü
MeI2365-01.jpg	R	Messe	gigan	f				ü	ü
MeI2377-01.jpg	R	Messe	gigan	m	Regression			ü
MeI2398-01.jpg	R	Messe	gigan	f				ü	ü
MeI2420-01.jpg	R	Messe	gigan	m	wrongly determined			ü
MeI2455-01_MIR.jpg	L	Messe	gigan	f	PCA	ü		ü
MeI2495-01.jpg	R	Messe	gigan	f	PCA		ü	ü
MeI2495-01_MIR.jpg	L	Messe	gigan	f	PCA		ü	ü
MeI2597-01_MIR.jpg	L	Messe	gigan	f	PCA	ü		ü
MeI291-01.jpg	R	Messe	gigan	f	PCA	ü	ü	ü
MeI291-01_MIR.jpg	L	Messe	gigan	f	PCA	ü	ü	ü
MeI292-01.jpg	R	Messe	gigan	f	PCA	ü	ü	ü
MeI292-01_MIR.jpg	L	Messe	gigan	f	PCA		ü	ü
MeI293-01_MIR.jpg	L	Messe	gigan	f	PCA			ü
MeI294-01.jpg	R	Messe	gigan	f	PCA		ü	ü
MeI294-01_MIR.jpg	L	Messe	gigan	f	PCA		ü	ü
MeI3012-01_MIR.jpg	L	Messe	gigan	f	PCA			ü
MeI3103-01.jpg	R	Messe	simil	m	PCA			ü
MeI315-01_MIR.jpg	L	Messe	gigan	m		ü		ü
MeI316-01.jpg	R	Messe	gigan	m				ü
MeI318-01.jpg	R	Messe	gigan	m	PCA			ü
MeI3258-01.jpg	R	Messe	gigan	m	bad interpolation	ü	ü	ü
MeI3258-01_MIR.jpg	L	Messe	gigan	m			ü	ü
MeI3268-01_MIR.jpg	L	Messe	gigan	m	PCA			ü
MeI3275-01_MIR.jpg	L	Messe	gigan	m	wrongly determined			ü
MeI3282-01_MIR.jpg	L	Messe	gigan	f	PCA			ü
MeI330-01_MIR.jpg	L	Messe	simil	f	wrongly determined			ü
MeI331-01.jpg	R	Messe	gigan	f				ü
MeI3320-02_MIR.jpg	L	Messe	gigan	m	PCA			ü
MeI332-01_MIR.jpg	L	Messe	gigan	f	PCA	ü		ü
MeI3324-01.jpg	R	Messe	gigan	m	PCA			ü
MeI335-01.jpg	R	Messe	simil	m	PCA			ü
MeI336-01.jpg	R	Messe	gigan	f	PCA	ü	ü	ü
MeI336-01_MIR.jpg	L	Messe	gigan	f	PCA		ü	ü
MeI3362-01.jpg	R	Messe	gigan	m	PCA		ü	ü
MeI3362-01_MIR.jpg	L	Messe	gigan	m	PCA		ü	ü	ü
MeI3381-01_MIR.jpg	L	Messe	simil	f	PCA			ü
MeI3385-01.jpg	R	Messe	gigan	m	PCA			ü
MeI339-01.jpg	R	Messe	simil	f	PCA			ü
MeI3405-01_MIR.jpg	L	Messe	gigan	m	PCA			ü
MeI341-01_MIR.jpg	L	Messe	gigan	f				ü
MeI3424-01.jpg	R	Messe	gigan	m				ü
MeI343-01.jpg	R	Messe	gigan	f		ü		ü
MeI344-01_MIR.jpg	L	Messe	gigan	f				ü
MeI345-01.jpg	R	Messe	gigan	f		ü		ü
MeI3475-01.jpg	R	Messe	simil	f	PCA			ü
MeI3477-01.jpg	R	Messe	simil	f	PCA		ü	ü
MeI3477-01_MIR.jpg	L	Messe	simil	f	PCA	ü	ü	ü
MeI348-01.jpg	R	Messe	simil	f	PCA			ü
MeI349-01.jpg	R	Messe	gigan	f	small female			ü
MeI350-01_MIR.jpg	L	Messe	gigan	f				ü
MeI3646-01.jpg	R	Messe	gigan	f	PCA			ü	ü
MeI3672-01_MIR.jpg	L	Messe	gigan	f	PCA			ü
MeI3714-01_MIR.jpg	L	Messe	gigan	f	PCA			ü
MeI3730-01_MIR.jpg	L	Messe	simil	f	PCA			ü	ü
MeI3736-01_MIR.jpg	L	Messe	simil	f	PCA			ü
MeI3739-01_MIR.jpg	L	Messe	simil	f	PCA			ü
MeI3810-01.jpg	R	Messe	gigan	m	PCA			ü
MeI3817-01_MIR.jpg	L	Messe	gigan	m	PCA	ü		ü
MeI3836-01_MIR.jpg	L	Messe	simil	f	PCA			ü
MeI3992-01.jpg	R	Messe	simil	f	PCA			ü
MeI4060-01_MIR.jpg	L	Messe	simil	f				ü
MeI406-01.jpg	R	Messe	gigan	f	PCA	ü	ü	ü
MeI406-01_MIR.jpg	L	Messe	gigan	f	PCA	ü	ü	ü
MeI408-01.jpg	R	Messe	gigan	f	PCA			ü
MeI409-01_MIR.jpg	L	Messe	gigan	f	PCA			ü
MeI4104-01_MIR.jpg	L	Messe	gigan	f	PCA			ü
MeI411-01.jpg	R	Messe	simil	f	PCA		ü	ü
MeI411-01_MIR.jpg	L	Messe	simil	f	PCA		ü	ü
MeI4124-01_MIR.jpg	L	Messe	gigan	m	PCA			ü
MeI4151-01.jpg	R	Messe	gigan	f	PCA, Regression			ü
MeI4159-01_MIR.jpg	L	Messe	gigan	m	PCA			ü
MeI4173-01.jpg	R	Messe	gigan	m	PCA			ü
MeI4175-01.jpg	R	Messe	simil	m	PCA			ü
MeI426-01.jpg	R	Messe	gigan	m				ü
MeI45-01.jpg	R	Messe	gigan	f	PCA	ü	ü	ü
MeI45-01_MIR.jpg	L	Messe	gigan	f	PCA	ü	ü	ü
MeI4581-01.jpg	R	Messe	gigan	f	PCA			ü
MeI4582-01.jpg	R	Messe	gigan	f	PCA			ü
MeI4583-01.jpg	R	Messe	gigan	f	PCA			ü
MeI4635-01_MIR.jpg	L	Messe	gigan	f	PCA	ü		ü
MeI4646-01_MIR.jpg	L	Messe	simil	f	PCA			ü
MeI4725-01_MIR.jpg	L	Messe	gigan	f	PCA			ü
MeI4752-01.jpg	R	Messe	gigan	m	PCA			ü
MeI4756-01.jpg	R	Messe	gigan	f				ü
MeI4838-01_MIR.jpg	L	Messe	gigan	f				ü
MeI489-01.jpg	R	Messe	gigan	f				ü	ü
MeI5127-01.jpg	R	Messe	simil	f	PCA			ü
MeI5144-01.jpg	R	Messe	simil	f	PCA	ü		ü
MeI52-01_MIR.jpg	L	Messe	gigan	m	PCA			ü	ü
MeI5316-01.jpg	R	Messe	simil	f	PCA	ü		ü
MeI5333-01.jpg	R	Messe	gigan	f	PCA			ü
MeI5358-01_MIR.jpg	L	Messe	simil	m	PCA			ü
MeI5394-01.jpg	R	Messe	simil	f	PCA			ü
MeI541-01_MIR.jpg	L	Messe	gigan	f	PCA	ü		ü
MeI5446-01_MIR.jpg	L	Messe	gigan	f	PCA			ü
MeI5567-01.jpg	R	Messe	gigan	f	PCA			ü
MeI5747-01_MIR.jpg	L	Messe	simil	f	PCA	ü		ü
MeI5774-01_MIR.jpg	L	Messe	gigan	f	PCA	ü		ü
MeI5775-01.jpg	R	Messe	gigan	f				ü
MeI5789-01_MIR.jpg	L	Messe	simil	m	PCA			ü
MeI5859-01_MIR.jpg	L	Messe	simil	f	PCA			ü
MeI5862-01_MIR.jpg	L	Messe	simil	m	PCA			ü
MeI5865-01.jpg	R	Messe	simil	f	PCA			ü
MeI590-01.jpg	R	Messe	simil	m	PCA			ü
MeI591-01_MIR.jpg	L	Messe	gigan	m	PCA			ü
MeI5945-01_MIR.jpg	L	Messe	gigan	f				ü
MeI600-01_MIR.jpg	L	Messe	simil	m				ü
MeI6130-01_MIR.jpg	L	Messe	gigan	f		ü		ü
MeI6131-01.jpg	R	Messe	simil	m				ü
MeI6132-01.jpg	R	Messe	gigan	f				ü
MeI6140-01.jpg	R	Messe	gigan	f				ü
MeI6169-01.jpg	R	Messe	simil	f	PCA			ü
MeI6214-01.jpg	R	Messe	simil	m				ü
MeI6217-01_MIR.jpg	L	Messe	gigan	f				ü	ü
MeI6245-01_MIR.jpg	L	Messe	gigan	f				ü
MeI6246-01.jpg	R	Messe	simil	f				ü
MeI6250-01_MIR.jpg	L	Messe	gigan	f				ü
MeI6267-01_MIR.jpg	L	Messe	gigan	f		ü		ü
MeI6290-01_MIR.jpg	L	Messe	gigan	f				ü
MeI6296-01.jpg	R	Messe	simil	f				ü
MeI6384-01.jpg	R	Messe	gigan	f				ü
MeI6385-01.jpg	R	Messe	gigan	f				ü
MeI6576-01.jpg	R	Messe	gigan	f			ü	ü
MeI6576-01_MIR.jpg	L	Messe	gigan	f		ü	ü	ü
MeI6577-01.jpg	R	Messe	gigan	f				ü
MeI6577-01_MIR.jpg	L	Messe	gigan	f				ü
MeI6579-01.jpg	R	Messe	gigan	f		ü		ü
MeI6606-01_MIR.jpg	L	Messe	simil	f	PCA			ü
MeI6711-01.jpg	R	Messe	gigan	f	PCA			ü
MeI6713-01_MIR.jpg	L	Messe	gigan	f	PCA			ü
MeI6714-01_MIR.jpg	L	Messe	gigan	f	PCA			ü
MeI6717-01_MIR.jpg	L	Messe	gigan	f				ü
MeI6745-01.jpg	R	Messe	simil	m	PCA			ü
MeI6804-01.jpg	R	Messe	gigan	f	PCA			ü
MeI7016-01_MIR.jpg	L	Messe	gigan	f	PCA			ü
MeI7017-01.jpg	R	Messe	gigan	f	PCA			ü
MeI7019-01.jpg	R	Messe	simil	f	PCA		ü	ü
MeI7019-01_MIR.jpg	L	Messe	simil	f	PCA	ü	ü	ü
MeI7048-01.jpg	R	Messe	gigan	f	PCA			ü
MeI7069-01_MIR.jpg	L	Messe	gigan	f	PCA			ü
MeI7074-01.jpg	R	Messe	gigan	f	PCA			ü
MeI7075-01_MIR.jpg	L	Messe	gigan	f	wrongly determined			ü
MeI7129-01_MIR.jpg	L	Messe	simil	f				ü	ü
MeI7139-01.jpg	R	Messe	simil	m	wrongly determined			ü
MeI7144-01.jpg	R	Messe	gigan	f	PCA		ü	ü
MeI7144-01_MIR.jpg	L	Messe	gigan	f	PCA		ü	ü
MeI7335-01_MIR.jpg	L	Messe	simil	f	PCA			ü
MeI7515-01.jpg	R	Messe	gigan	f	PCA			ü
MeI7519-01.jpg	R	Messe	simil	f				ü
MeI7520-01.jpg	R	Messe	gigan	f			ü	ü
MeI7520-01_MIR.jpg	L	Messe	gigan	f			ü	ü
MeI7544-01.jpg	R	Messe	gigan	f	PCA			ü
MeI7550-01.jpg	R	Messe	gigan	f	PCA			ü
MeI7564-01.jpg	R	Messe	gigan	m	Regression			ü
MeI7577-01.jpg	R	Messe	gigan	m	PCA			ü
MeI7583-01_MIR.jpg	L	Messe	gigan	f	PCA			ü
MeI8100-01_MIR.jpg	L	Messe	simil	m		ü		ü
MeI8117-01_MIR.jpg	L	Messe	gigan	f	PCA			ü	ü
MeI8121-01.jpg	R	Messe	simil	m				ü
MeI8466-01_MIR.jpg	L	Messe	gigan	f	PCA			ü
MeI8467-01.jpg	R	Messe	gigan	f	PCA		ü	ü
MeI8467-01_MIR.jpg	L	Messe	gigan	f	PCA		ü	ü
MeI8468-01.jpg	R	Messe	gigan	f				ü
MeI8509-01_MIR.jpg	L	Messe	gigan	f	PCA			ü	ü
MeI8538-01.jpg	R	Messe	gigan	f	PCA			ü
MeI8575-01.jpg	R	Messe	gigan	f	PCA			ü
MeI8576-01.jpg	R	Messe	gigan	f				ü
MeI8732-01_MIR.jpg	L	Messe	gigan	f	PCA			ü
MeI8896-01.jpg	R	Messe	gigan	m	Regression		ü	ü
MeI8896-01_MIR.jpg	L	Messe	gigan	m	Regression		ü	ü
MeI8897-01_MIR.jpg	L	Messe	simil	f	wrongly determined			ü
MeI8986-01_MIR.jpg	L	Messe	gigan	f	small female			ü	ü
MeI8988-01.jpg	R	Messe	gigan	f	PCA			ü
MeI906-01_MIR.jpg	L	Messe	gigan	m	PCA			ü
MeI978-01.jpg	R	Messe	simil	f	PCA	ü		ü
MeI980-01.jpg	R	Messe	gigan	f	PCA			ü
MeI982-01.jpg	R	Messe	gigan	f	PCA			ü
MeI983-01.jpg	R	Messe	simil	f	PCA			ü
MeI985-01_MIR.jpg	L	Messe	gigan	f	PCA			ü	ü
MeI986-01.jpg	R	Messe	gigan	f	PCA			ü
MeI987-01_MIR.jpg	L	Messe	gigan	f	PCA			ü
MeI989-01_MIR.jpg	L	Messe	simil	f	PCA			ü
MeI990-01.jpg	R	Messe	gigan	f	PCA			ü
MeI991-01_MIR.jpg	L	Messe	simil	f	Regression			ü
MeI992-01.jpg	R	Messe	gigan	m	PCA			ü
MeI993-01_MIR.jpg	L	Messe	gigan	f	PCA			ü
MeI994-01_MIR.jpg	L	Messe	gigan	f	PCA			ü
MeI996-01_MIR.jpg	L	Messe	gigan	f	PCA			ü
MeI999-01.jpg	R	Messe	gigan	f	PCA			ü
PE_1990_1042-LS_b_MIR.jpg	L	Eckfe	speci	m				ü
PE_1990_582-LS_a_MIR.jpg	L	Eckfe	speci	m	Regression	ü		ü
PE_1990_688-LS_a.jpg	R	Eckfe	speci	m				ü
PE_1990_786-LS_a.jpg	R	Eckfe	speci	m				ü
PE_1992_258-LS_MIR.jpg	L	Eckfe	speci	m	Regression			ü
PE_1992_506-LS_MIR.jpg	L	Eckfe	speci	m				ü
PE_1993_294-LS.jpg	R	Eckfe	speci	m	Regression			ü
PE_1994_164-LS_a.jpg	R	Eckfe	speci	m				ü
PE_1994_166-LS_a.jpg	R	Eckfe	speci	m	Regression			ü
PE_1994_167-LS_a.jpg	R	Eckfe	speci	f				ü
PE_1994_168-LS.jpg	R	Eckfe	speci	m	Regression			ü
PE_1994_170-LS.jpg	R	Eckfe	speci	m	Regression			ü
PE_1994_173-LS_a.jpg	R	Eckfe	speci	m	Regression		ü	ü
PE_1994_173-LS_b_MIR.jpg	L	Eckfe	speci	m	Regression		ü	ü
PE_1997_27-LS_a_MIR.jpg	L	Eckfe	speci	m	Regression		ü	ü
PE_1997_27-LS_b.jpg	R	Eckfe	speci	m	Regression	ü	ü	ü
PE_1997_31-LS_b.jpg	R	Eckfe	speci	m	Regression			ü
PE_1997_56-LS_b_MIR.jpg	L	Eckfe	speci	m	Regression			ü
PE_1997_57-LS_a_MIR.jpg	L	Eckfe	speci	m	Regression		ü	ü
PE_1997_57-LS_b.jpg	R	Eckfe	speci	m	Regression		ü	ü
PE_1997_58-LS_MIR.jpg	L	Eckfe	speci	m	Regression			ü
PE_1998_10-LS.jpg	R	Eckfe	speci	m	Regression			ü
PE_1998_11-LS_a_MIR.jpg	L	Eckfe	speci	m	Regression			ü
PE_1998_17-LS_b.jpg	R	Eckfe	speci	f	Regression			ü
PE_1998_23-LS_a_MIR.jpg	L	Eckfe	speci	m				ü
PE_2000_15-LS_a_MIR.jpg	L	Eckfe	speci	m	Regression			ü
PE_2000_16-LS_MIR.jpg	L	Eckfe	speci	m	Regression			ü
PE_2000_17-LS_MIR.jpg	L	Eckfe	speci	m				ü
PE_2000_18-LS_a_MIR.jpg	L	Eckfe	speci	m				ü
PE_2000_19-LS_a_MIR.jpg	L	Eckfe	speci	m	Regression			ü
PE_2000_20-LS_MIR.jpg	L	Eckfe	speci	m	Regression			ü
PE_2000_21-LS_a_MIR.jpg	L	Eckfe	speci	m			ü	ü
PE_2000_21-LS_b.jpg	R	Eckfe	speci	m			ü	ü
PE_2000_22-LS_a_1.jpg	R	Eckfe	speci	m	Regression			ü
PE_2000_25-LS_MIR.jpg	L	Eckfe	speci	m	Regression			ü
PE_2000_26-LS_a_MIR.jpg	L	Eckfe	speci	m	Regression		ü	ü
PE_2000_26-LS_b.jpg	R	Eckfe	speci	m	Regression		ü	ü
PE_2000_29-LS_a.jpg	R	Eckfe	speci	m	Regression	ü		ü
PE_2000_3-LS_a_1_MIR.jpg	L	Eckfe	speci	m			ü	ü
PE_2000_3-LS_a_2.jpg	R	Eckfe	speci	m			ü	ü
PE_2000_874-LS_MIR.jpg	L	Eckfe	speci	m				ü
Formicium-berryi	R	Tenne	berry	?
Formicium-brodiei	R	Engla	brodi	?
Formicium-mirabile	R	Engla	mira	?
Legend:	m= male	gigan= Formicium giganteum
	f= female	simil= Formicium simillimum
	?= indet	brodi= Formicium brodiei
		berry= Formicium berryi
		speci= Formicium sp.
	changed to F. giganteum			Eckfe= Eckfeld
	changed to F. simillimum			Messe= Messel
	changed to female			Tenne= Claiborne Group
	changed to male			Engla= Bracklesham Group
