# Supplementary material for: Giant ants and their shape: revealing relationships in the genus Titanomyrma with geometric morphometrics
Source: PeerJ. 2018 Jan 16;6:e4242. doi: 10.7717/peerj.4242 (PMC5774302; doi:10.7717/peerj.4242)
Supplement: Supplemental Information 3 [file peerj-06-4242-s003.xlsx]

## Sheet: Tabelle1
Specimen ID	Original species	Belongs to	Original sex	Is	Reevelauated by Analysis:	Problems in Shape
MeI14318-MIR	giganteum	simillimum	female	female	Species PCA
MeI1483	giganteum	simillimum	female	female	Species PCA
MeI15300-MIR	simillimum	giganteum	?	male	Species PCA
MeI3275-MIR	simillimum	giganteum	?	male	Species PCA
MeI330	simillimum	simillimum	male	female	Sex PCA
MeI7075-MIR	simillimum	giganteum	female	female	Species PCA
MeI7139	giganteum	simillimum	?	male	Species PCA
MeI8896	simillimum	giganteum	male	male	Species PCA
MeI8896-MIR	simillimum	giganteum	male	male	Species PCA
MeI8897-MIR	giganteum	simillimum	female	female	Species PCA
Species problematic
MeI4060-MIR	simillimum	simillimum	female	female	Wing Venation	bad preservation
MeI15343	giganteum	giganteum	female	female	Wing Venation	bad interpolation
MeI14527-MIR	simillimum	simillimum	female	female	Wing Venation	bad interpolation
MeI3362	?	giganteum	?	male	Wing Venation	?
simillima sex problematic
MeI14527-MIR	simillimum	simillimum	female	female	Wing Venation	bad interpolation
MeI991-MIR	simillimum	simillimum	?	female	Size	perfect intermediate
MeI335	simillimum	simillimum	?	male	Size	?
MeI14404-MIR	?	simillimum	?	male	Wing Venation	?
MeI2006	simillimum	simillimum	?	female	Size	bad interpolation
gigantea sex problematic
MeI12261-MIR	?	giganteum	?	female	Size	?
MeI7075-MIR	?	giganteum	female	female	Size	?
MeI15337	giganteum	giganteum	?	male	Wing Venation	?
MeI1234	?	giganteum	?	female	Size	bad interpolation
MeI8986-MIR	giganteum	giganteum	female	female	Size	broad wing
MeI14312	giganteum	giganteum	female	female	Wing Venation	?
MeI2317	?	giganteum	?	male	Size	bad interpolation
MeI2361	?	giganteum	?	male	Size	?
MeI3258	giganteum	giganteum	male	male	Size	bad interpolation
MeI13193-MIR	giganteum	giganteum	female	female	Size	bad interpolation
MeI7564	giganteum	giganteum	female	male	Size	m-cu missing
MeI2377	giganteum	giganteum	male	male	Size	?
MeI14771	giganteum	giganteum	female	female	Wing Venation	bad interpolation
MeI986	giganteum	giganteum	?	female	Size	?
MeI332-MIR	giganteum	giganteum	?	female	Size	bad interpolation
MeI15343-MIR	giganteum	giganteum	female	female	Wing Venation	?
MeI52-MIR	giganteum	giganteum	?	male	Size	?
MeI1219	giganteum	giganteum	?	female	Size	bad interpolation
MeI12104	?	giganteum	?	male	Size	?
MeI3424	giganteum	giganteum	male	male	Size	?
HLMD-13500	giganteum	giganteum	?	male	Wing Venation	?
MeI1249-MIR	?	giganteum	?	female	Size	?
MeI4104	?	giganteum	?	female	Size	?
MeI1243	giganteum	giganteum	female	female	Size	bad interpolation
MeI1230-MIR	?	giganteum	?	female	Size	bad interpolation
MeI3385	?	giganteum	?	male	Size	?
MeI591-MIR	giganteum	giganteum	?	male	Size	?
