# Supplementary material for: Giant ants and their shape: revealing relationships in the genus Titanomyrma with geometric morphometrics
Source: PeerJ. 2018 Jan 16;6:e4242. doi: 10.7717/peerj.4242 (PMC5774302; doi:10.7717/peerj.4242)
Supplement: Supplemental Information 4 [file peerj-06-4242-s004.xlsx]

## Sheet: LDA Hits
SD 9 From cross-validation:	T g f	T g m	T s f	T s m	E s m	E s f A T g	E s f A T s	F mi	F be	F br	Combined Hit Ratio [%] (only more than one specimen)
Titanomyrma gigantea female	207	2 (205)	0 (207)	0 (207)	0 (207)	0 (207)	0 (207)	0 (207)	0 (207)	0 (207)	99.76
Titanomyrma gigantea male	1 (49)	50	1 (49)	0 (50)	0 (50)	0 (50)	0 (50)	0 (50)	0 (50)	0 (50)	99.00
Titanomyrma simillima female	0 (80)	0 (80)	80	1 (79)	3 (77)	0 (80)	0 (80)	0 (80)	0 (80)	0 (80)	98.75
Titanomyrma simillima male	1 (20)	0 (21)	0 (21)	21	0 (21)	0 (21)	0 (21)	0 (21)	0 (21)	0 (21)	99.81
Eckfeld specimens males	0 (39)	1 (38)	1 (38)	2 (37)	39	0 (39)	0 (39)	0 (39)	0 (39)	0 (39)	97.44
Eckfeld specimens females Aff. T. gigantea	1 (0)	1 (0)	1 (0)	1 (0)	1 (0)	1
Eckfeld specimens females Aff. T. simillima	1 (0)	1 (0)	1 (0)	1 (0)	1 (0)		1
Formicium mirabile	0 (1)	0 (1)	1 (0)	1 (0)	0 (1)			1
Formicium berryi	1 (0)	1 (0)	1 (0)	1 (0)	0 (1)				1
Formicium brodiei	1 (0)	1 (0)	1 (0)	1 (0)	0 (1)					1
	SD 9		p-values						SD 9		p-values
	Group One	Group Two	Procrustes	Mahalanobis	Individual Hit Ratio [%]				Group One	Group Two	Procrustes	Mahalanobis	Individual Hit Ratio [%]	Wrong (Right)
	Titanomyrma gigantea female	Eckfeld specimens males	<.0001	<.0001	100.00				Titanomyrma gigantea	Others	<.0001	<.0001	100.00	0 (257)
	Titanomyrma gigantea male	Eckfeld specimens males	<.0001	<.0001	100.00				Titanomyrma simillima	Others	<.0001	<.0001	96.04	4 (97)
	Titanomyrma gigantea female	Titanomyrma gigantea male	<.0001	<.0001	99.03				Eckfeld specimens males	Others	<.0001	<.0001	94.87	2 (37)
	Titanomyrma gigantea female	Titanomyrma simillima female	<.0001	<.0001	100.00				Others	Titanomyrma gigantea	<.0001	<.0001	100.00	0 (144)
	Titanomyrma gigantea female	Titanomyrma simillima male	<.0001	<.0001	100.00				Others	Titanomyrma simillima	<.0001	<.0001	98.00	6 (294)
	Titanomyrma gigantea male	Titanomyrma simillima female	<.0001	<.0001	98.00				Others	Eckfeld specimens males	<.0001	<.0001	98.34	6 (356)
	Titanomyrma gigantea male	Titanomyrma simillima male	<.0001	<.0001	100.00				Titanomyrma gigantea	Titanomyrma simillima	<.0001	<.0001	100.00	0 (257)
	Titanomyrma simillima female	Eckfeld specimens males	<.0001	<.0001	96.25				Titanomyrma simillima	Titanomyrma gigantea	<.0001	<.0001	100.00	0 (101)
	Titanomyrma simillima male	Eckfeld specimens males	<.0001	<.0001	100.00
	Titanomyrma simillima female	Titanomyrma simillima male	<.0001	<.0001	98.25				SD 6 Regression on Titanomyrma pooled within species
									Residuals		p-values
	Eckfeld specimens males	Titanomyrma gigantea female	<.0001	<.0001	100.00				Group One	Group Two	Procrustes	Mahalanobis	Individual Hit Ratio [%]	Wrong (Right)
	Eckfeld specimens males	Titanomyrma gigantea male	<.0001	<.0001	97.44				Female	Male	0.609	0.8	65.33	78 (147)
	Titanomyrma gigantea male	Titanomyrma gigantea female	<.0001	<.0001	98.00				Male	Female	0.609	0.8	55.38	29 (36)
	Titanomyrma simillima female	Titanomyrma gigantea female	<.0001	<.0001	100.00				Prediction		p-values
	Titanomyrma simillima male	Titanomyrma gigantea female	<.0001	<.0001	95.24				Group One	Group Two	Procrustes	Mahalanobis	Individual Hit Ratio [%]	Wrong (Right)
	Titanomyrma simillima female	Titanomyrma gigantea male	<.0001	<.0001	100.00				Female	Male	<.0001	<.0001	84.44	35 (190)
	Titanomyrma simillima male	Titanomyrma gigantea male	<.0001	<.0001	100.00				Male	Female	<.0001	<.0001	100.00	0 (65)
	Eckfeld specimens males	Titanomyrma simillima female	<.0001	<.0001	97.44
	Eckfeld specimens males	Titanomyrma simillima male	<.0001	<.0001	94.87				SD 10
	Titanomyrma simillima male	Titanomyrma simillima female	<.0001	<.0001	100.00				From cross-validation:	T g f	T g m	T s f	T s m	E s m	Combined Hit Ratio [%]
									Titanomyrma gigantea female	158	1 (157)	0 (158)	0 (158)	0 (158)	99.84
									Titanomyrma gigantea male	0 (46)	46	0 (46)	0 (46)	0 (46)	100
	Titanomyrma gigantea female	Eckfeld specimens females Aff. T. gigantea	0.022	<.0001					Titanomyrma simillima female	0 (67)	0 (67)	67	0 (67)	0 (67)	100
	Titanomyrma gigantea male	Eckfeld specimens females Aff. T. gigantea	0.137	<.0001					Titanomyrma simillima male	0 (19)	0 (19)	0 (19)	19	0 (19)	100
	Titanomyrma gigantea female	Eckfeld specimens females Aff. T. simillima	0.002	<.0001					Eckfeld specimens males	0 (39)	0 (39)	0 (39)	2 (37)	39	98.71
	Titanomyrma gigantea male	Eckfeld specimens females Aff. T. simillima	0.023	0.003					all p-values <.0001
	Titanomyrma gigantea female	Formicium berryi	<.0001	0.001
	Titanomyrma gigantea male	Formicium berryi	0.023	0.002					SD11					SD11, after size correction
	Titanomyrma gigantea female	Formicium brodiei	0.005	0.004					From cross-validation:	E s m	E s big	Hit Ratio [%]		From cross-validation:	E s m	E s big	Hit Ratio [%]
	Titanomyrma gigantea male	Formicium brodiei	0.019	0.02					Eckfeld specimens males	34	10 (28)	64.29		Eckfeld specimens males	34	6 (28)	82.35
	Titanomyrma simillima female	Eckfeld specimens females Aff. T. gigantea	0.047	0.049					Big Eckfeld specimens males	4 (1)	5	20		Big Eckfeld specimens males	4 (1)	5	20
	Titanomyrma simillima male	Eckfeld specimens females Aff. T. gigantea	0.021	0.19					p-value 0.024					p-value 0.024
	Titanomyrma simillima female	Eckfeld specimens females Aff. T. simillima	0.038	0.026
	Titanomyrma simillima male	Eckfeld specimens females Aff. T. simillima	0.01	0.243
	Titanomyrma simillima female	Formicium berryi	0.024	0.01
	Titanomyrma simillima male	Formicium berryi	0.013	0.421
	Titanomyrma simillima female	Formicium brodiei	0.13	0.011
	Titanomyrma simillima male	Formicium brodiei	0.021	0.54
	Eckfeld specimens males	Eckfeld specimens females Aff. T. gigantea	0.108	0.248
	Eckfeld specimens males	Eckfeld specimens females Aff. T. simillima	0.047	0.153
	Eckfeld specimens males	Formicium berryi	0.021	0.029
	Eckfeld specimens males	Formicium brodiei	0.239	0.037
	Titanomyrma gigantea female	Formicium mirabile	<.0001	0.001
	Titanomyrma gigantea male	Formicium mirabile	0.024	0.001
	Titanomyrma simillima female	Formicium mirabile	0.0447	0.0549
	Titanomyrma simillima male	Formicium mirabile	0.032	0.5293
	Eckfeld specimens males	Formicium mirabile	0.02	0.06

## Sheet: MD
SD 9 From cross-validation:	T g f	T g m	T s f	T s m	E s m	E s f A F	E s f A F s	F mi	F be	F br
Titanomyrma gigantea female	-	5.3306	10.1679	17.8366	13.8619	11.731	20.5003	14.6961	24.0335	20.7901
Titanomyrma gigantea male	5.3306	-	7.5436	10.2881	7.8248	12.0106	17.0858	12.4521	12.3325	11.9942
Titanomyrma simillima female	10.1679	7.5436	-	6.3161	5.792	8.0407	8.7667	7.6162	10.0973	9.817
Titanomyrma simillima male	17.8366	10.2881	6.3161	-	7.2093	64.4672	63.867	36.8197	48.3159	34.0909
Eckfeld specimens males	13.8619	7.8248	5.792	7.2093	-	8.5357	9.493	12.1586	12.1597	14.2761
Eckfeld specimens females Aff. F. giganteum	11.731	12.0106	8.0407	64.4672	8.5357	-
Eckfeld specimens females Aff. F. simillimum	20.5003	17.0858	8.7667	63.867	9.493		-
Formicium mirabile	14.6961	12.4521	7.6162	36.8197	12.1586			-
Formicium berryi	24.0335	12.3325	10.0973	48.3159	12.1597				-
Formicium brodiei	20.7901	11.9942	9.817	34.0909	14.2761					-
SD 10 From cross-validation:	T g f	T g m	T s f	T s m	E s m
Titanomyrma gigantea female	-	5.9582	10.9454	19.4642	14.0526
Titanomyrma gigantea male	5.9582	-	8.4311	11.9099	7.9427
Titanomyrma simillima female	10.9454	8.4311	-	7.2066	7.5194
Titanomyrma simillima male	19.4642	11.9099	7.2066	-	7.6397
Eckfeld specimens males	14.0526	7.9427	7.5194	7.6397	-
